# Supplementary material
Source: publisher figshare collection journal article supplement (https://karger.figshare.com/ndownloader/files/14606039)
Supplement: Supplementary file 1 [file 14606039]

**Supplementary Table 3.**  Characteristics of neuron profiles in the caudal perireticular nucleus.

| PARAMETER | ANTIBODY | |
| --- | --- | --- |
| Area (µm2) | PV | GAD |
| Number | 25 | 25 |
| Mean | 84.56 | 95.68 |
| Standard deviation | 30.19 | 40.11 |
| Range | 50.00-181.75 | 37.75-243.30 |
| Perimeter (µm) |  |  |
| Number | 25 | 25 |
| Mean | 37.49 | 39.54 |
| Standard deviation | 6.11 | 7.03 |
| Range | 28.89-55.51 | 27.94-62.00 |
| Length (µm) |  |  |
| Number | 25 | 25 |
| Mean | 13.16 | 13.92 |
| Standard deviation | 2.55 | 2.55 |
| Range | 9.49-19.12 | 10.37-21.30 |
| Width (µm) |  |  |
| Number | 25 | 25 |
| Mean | 8.37 | 8.72 |
| Standard deviation | 1.92 | 1.96 |
| Range | 5.77-13.95 | 5.45-15.21 |
| Eccentricity (Width/Length) |  |  |
| Number | 25 | 25 |
| Mean | 0.65 | 0.63 |
| Standard deviation | 0.14 | 0.10 |
| Range | 0.41-0.96 | 0.37-0.80 |
